# Supplementary material for: Kaempferol prevents acetaminophen-induced liver injury by suppressing hepatocyte ferroptosis via Nrf2 pathway activation
Source: Royal Society of Chemistry journal article supplement (doi:10.1039/d2fo02716j), 2023-01-01

**Fig1C. Hepatic H&E staining**

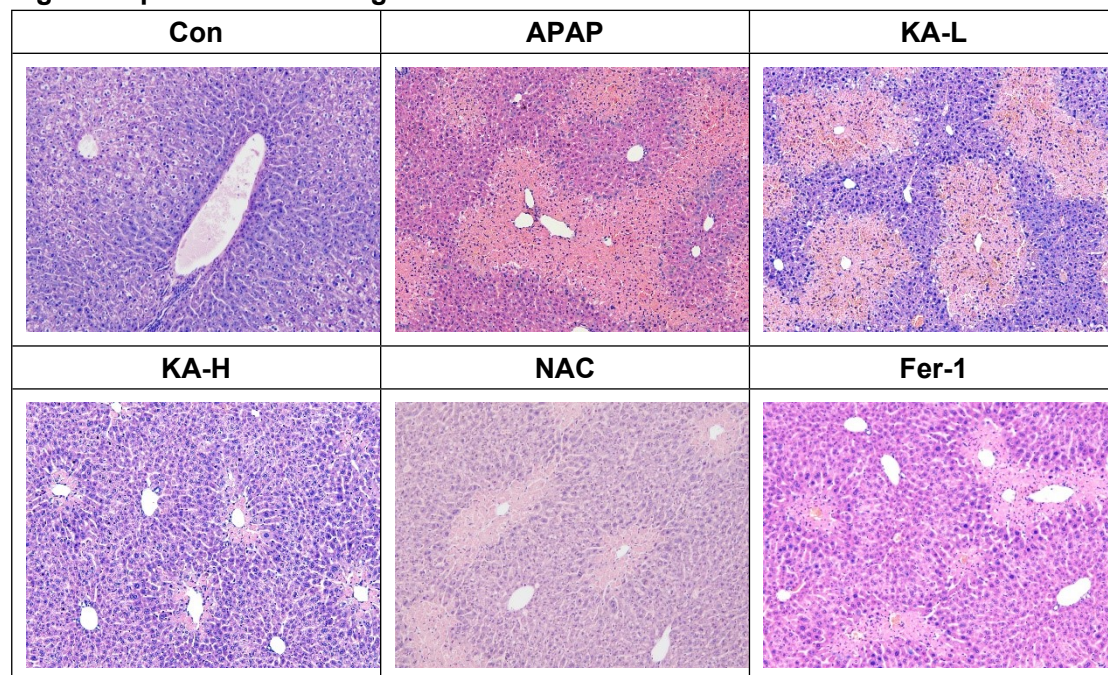

**Fig2A. IHC staining of 4-HNE**

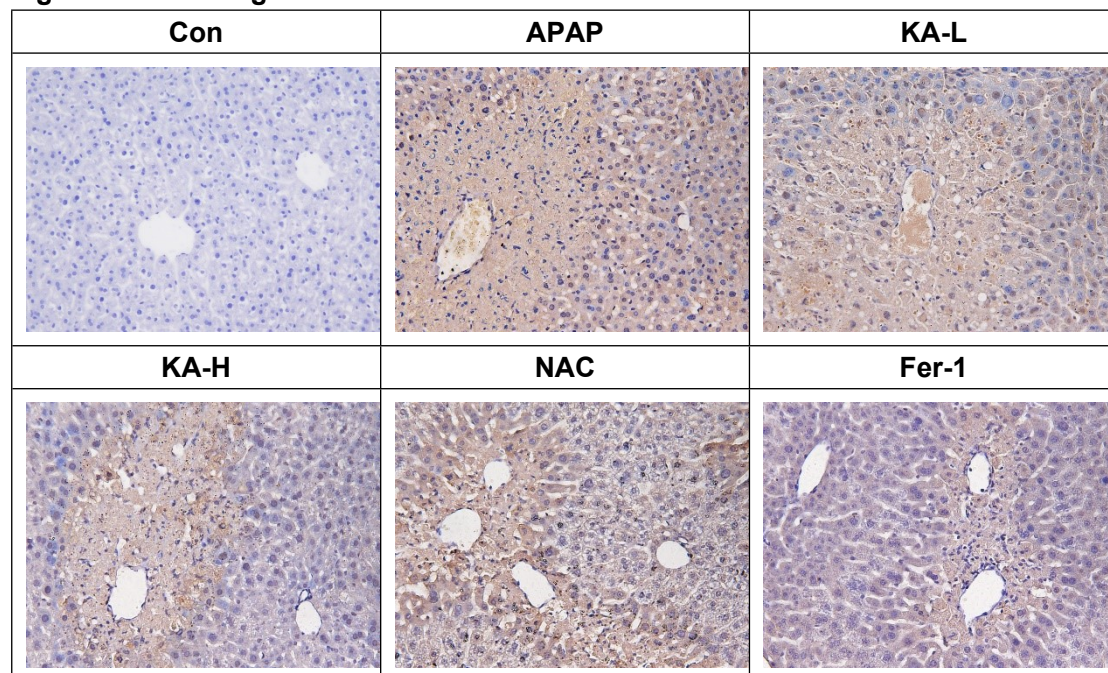

**Fig3D. MitoSox Red**

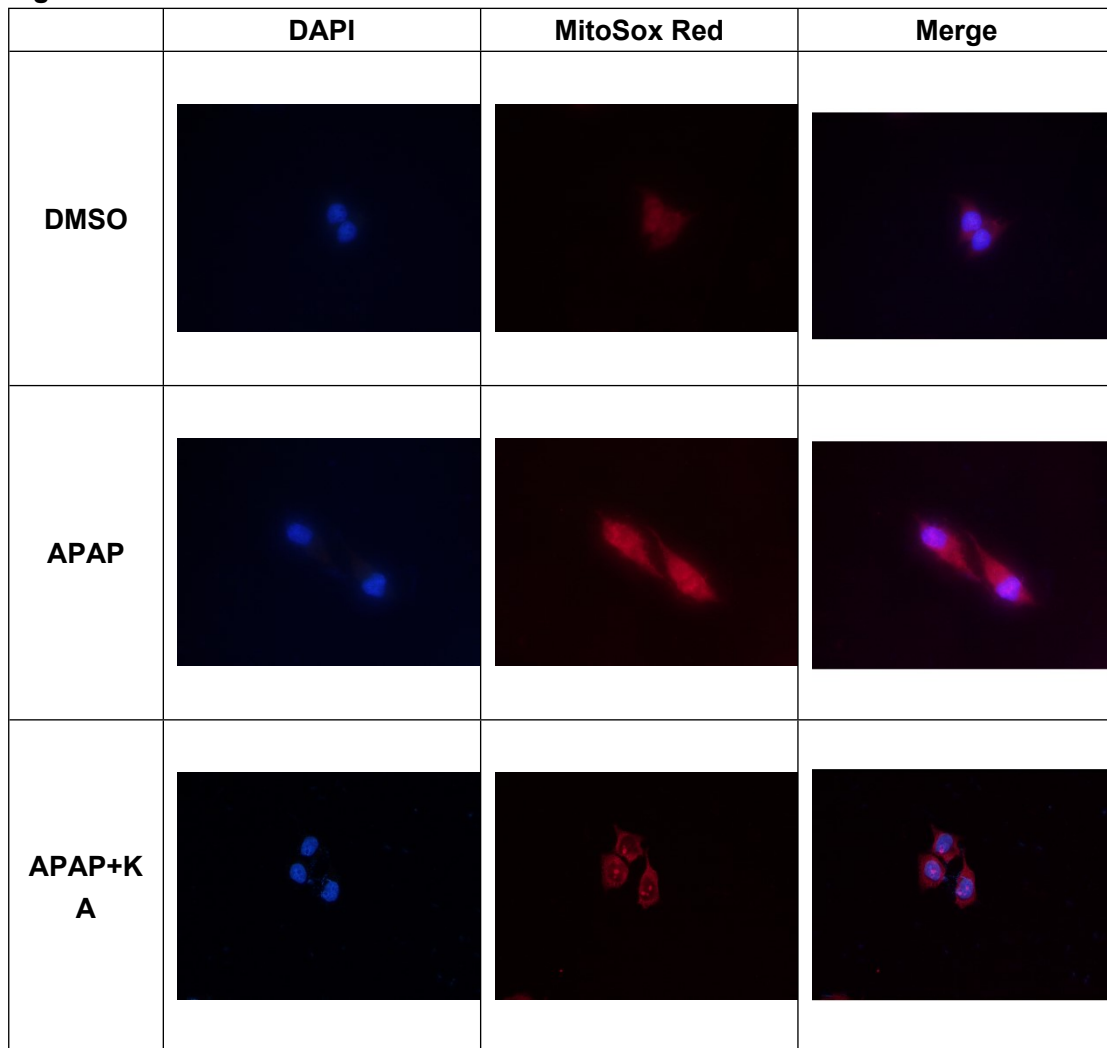

**Fig4A. Immunofluorescent staining of Nrf2**

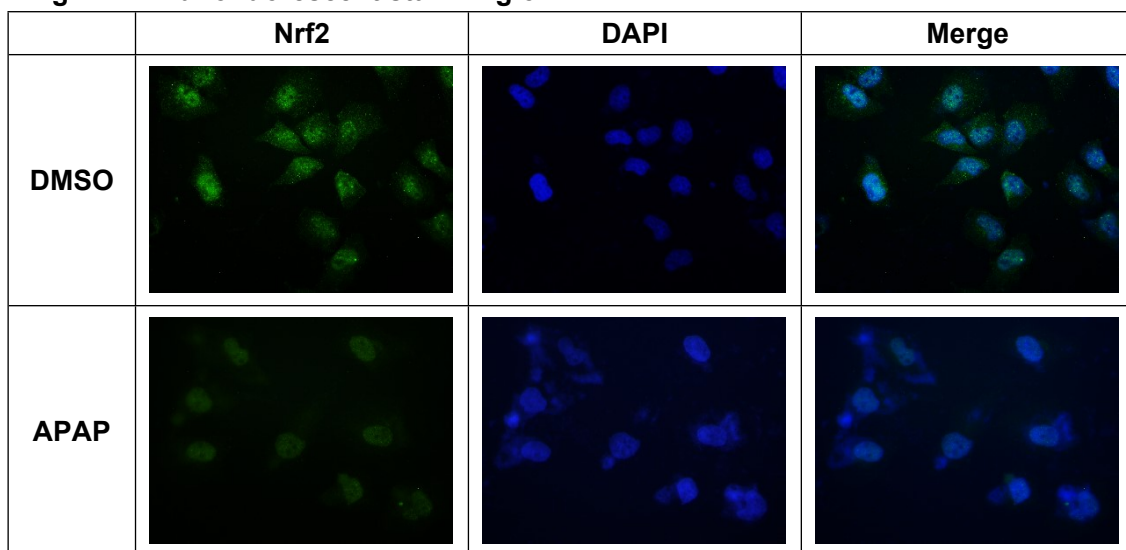

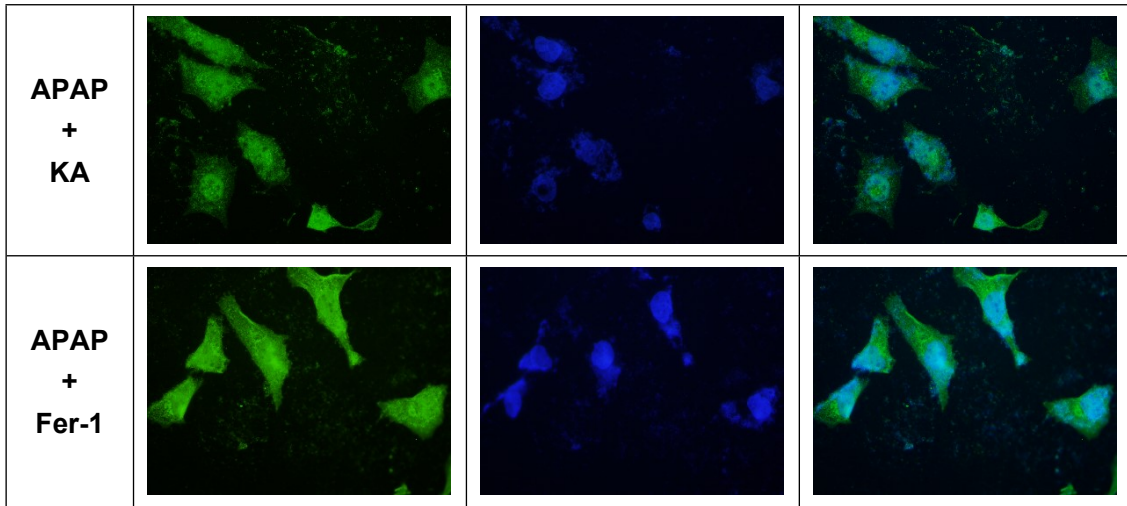

**FigS1B. IHC staining of CD68**

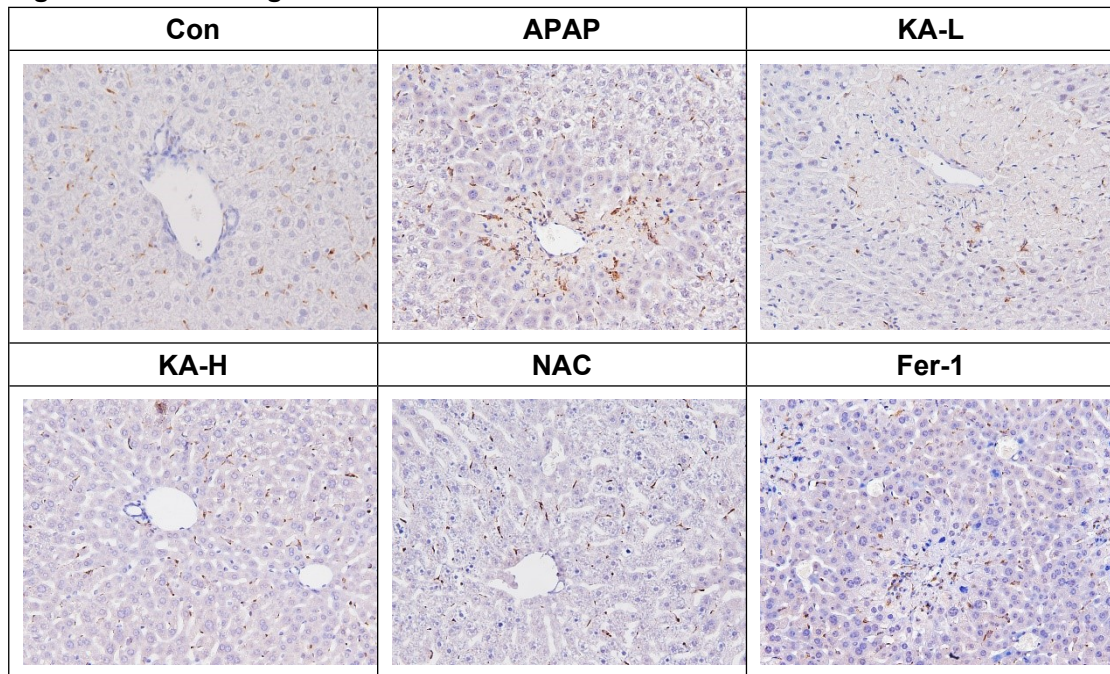

Supplement: d2fo02716j2.pdf [file d2fo02716j2.pdf]
