# Supplementary material for: Kaempferol prevents acetaminophen-induced liver injury by suppressing hepatocyte ferroptosis via Nrf2 pathway activation
Source: Royal Society of Chemistry journal article supplement (doi:10.1039/d2fo02716j), 2023-01-01
Supplement: d2fo02716j3.xlsx [file d2fo02716j3.xlsx]

## Sheet: Figure 1
Fig1D. Necrotic area statistics
Necrotic area (%)
	Groups
	Control	APAP	KA-L	KA-H	NAC	Fer-1
Sample1	0	45.53	48.41	27.8	22.94	5.77
Sample2	0	46.83	47.89	7.19	9.63	12.52
Sample3	0	64.75	29.33	14.65	20.88	15.1
Sample4	0	29.68	51.16	37.43	20.22	27.69
Fig1E. Serum ALT and AST levels
Serum ALT (IU/L)
	Groups
	Control	APAP	KA-L	KA-H	NAC	Fer-1
Sample1	45.5573	6162.32	12583.4	4695.11	175.234	944.433
Sample2	26.1762	10292.1	10259.5	3366.79	274.051	5332.36
Sample3	21.2554	12859.4	6311.55	8241.26	650.544	5609.24
Sample4	30.3006	13709.6	13307	5516.07	416.493	6412.19
Sample5	29.7756	13422.4	12723.5	8037.1	294.103	6261.58
Serum AST (IU/L)
	Groups
	Control	APAP	KA-L	KA-H	NAC	Fer-1
Sample1	36.4515	1739.78	1455.22	627.297	265.917	121.963
Sample2	22.7579	1930.08	806.344	212.659	123.143	474.214
Sample3	23.3743	1018.7	1588.09	619.056	481.431	357.474
Sample4	36.4515	594.467	1263.82	182.401	115.414	458.474
Sample5	22.9624	685.657	1768.53	702.56	326.772	505.883
Fig1F. ELISA
TNF-α (pg/mgprot)
	Groups
	Control	APAP	KA-L	KA-H	NAC	Fer-1
Sample1	43.6775	72.5161	34.5652	37.3551	28.536	34.5713
Sample2	31.0694	71.7602	39.4936	35.4993	44.4938	52.7771
Sample3	31.0243	49.1456	39.031	34.0865	36.7358	29.3457
Sample4	31.6632	53.6721	26.5285	30.0201	34.1483	44.5946
Sample5	25.5364	65.7429	40.1161	25.6124	50.3424	72.543
IL-1β (pg/mgprot)
	Groups
	Control	APAP	KA-L	KA-H	NAC	Fer-1
Sample1	34.9297	129.94	111.05	74.7182	90.7916	97.569
Sample2	59.0635	126.438	83.6443	105.544	109.987	81.934
Sample3	54.7858	129.7	79.0878	95.6718	115.021	90.1214
Sample4	27.0652	113.997	96.4088	80.0709	102.411	110.863
Sample5	20.4967	128.252	80.5181	76.9186	114.28	71.8914
Fig1G. q-PCR
Tnfa
	Groups
	Con	APAP	KA-L	KA-H	NAC	Fer-1
Sample1	0.279594	7.09304	2.10877	4.07388	1.91375	0.779923
Sample2	0.224752	15.4165	3.1963	1.45035	0.640115	3.77481
Sample3	1.53305	3.35521	3.85412	3.03438	0.635694	4.15948
Sample4	1.57615	15.047	6.52693	1.73076	0.908402	8.23292
Sample5	1.38646	9.58915	7.68158	1.03269	1.7428	8.85445
Il1b
	Groups
	Con	APAP	KA-L	KA-H	NAC	Fer-1
Sample1	0.848134	5.15998	2.45779	1.64832	3.14349	1.13474
Sample2	0.651738	5.86595	2.10288	4.9451	1.52876	2.48348
Sample3	0.941064	4.04844	3.41613	3.81319	1.58268	2.48348
Sample4	1.84339	13.0174	2.06675	5.01413	1.38738	2.80376
Sample5	0.715669	5.72535	5.41651	1.57571	2.51815	2.39889
Il6
	Groups
	Con	APAP	KA-L	KA-H	NAC	Fer-1
Sample1	0.442579	3.88795	1.6575	4.83665	0.450315	0.600405
Sample2	0.855007	3.92858	2.75874	1.98482	0.744327	0.469438
Sample3	1.77646	20.2382	1.98482	1.06733	0.455022	3.99725
Sample4	0.925951	16.6103	3.61503	1.73388	0.723973	4.06712
Sample5		24.2348	9.74058	1.18428	1.5955	2.11992
Ccl2
	Groups
	Con	APAP	KA-L	KA-H	NAC	Fer-1
Sample1	1.06499	50.0688	90.2491	15.1983	6.0664	1.32028
Sample2	0.348889	51.6551	87.1749	13.9369	1.10638	1.7241
Sample3	2.19746	136.792	49.8956	32.1298	9.58541	2.88954
Sample4	1.02871	52.7405	28.3611	5.94155	1.55924	14.6298
Sample5	0.359943	63.1557	80.4957	2.50679	2.79111	14.9372
Ccl5
	Groups
	Con	APAP	KA-L	KA-H	NAC	Fer-1
Sample1	1.39338	18.2977	7.69322	5.09325	8.1601	8.71553
Sample2	0.518921	16.779	8.41864	4.97118	2.15634	8.33157
Sample3	0.938604	9.40604	8.65532	3.96848	2.50288	8.4772
Sample4	0.817102	11.4208	4.26808	2.46842	8.50663	10.9176
Sample5	1.33199	7.61365	5.07563	1.82587	2.27141	14.4559
Fig2B. 4-HNE positive area statistics
postive area rate（%）
	Groups
	Con	APAP	KA-L	KA-H	NAC	Fer-1
Sample1	0	39.82	48.41	27.8	17.58	12.52
Sample2	0	46.83	29.33	7.19	26.49	15.1
Sample3	0	64.75	51.16	14.65	16.83	27.69
Sample4	0				9.6
Sample5					22.22
Fig2D. Hepatic iron & GSH levels
Liver iron (μmol/g)
	Groups
	Control	APAP	KA-L	KA-H	NAC	Fer-1
Sample1	0.266586	0.763947	0.529192	0.46553	0.628664	0.445636
Sample2	0.370037	0.799757	0.53715	0.473488	0.449614	0.397889
Sample3	0.302396	0.676411	0.57296	0.46553	0.549087	0.39391
Sample4	0.290459	1.22948	0.636622	0.509298	0.557044	0.413804
Sample5	0.270564	0.807714	0.636622	0.485424	0.473488	0.549087
Liver GSH (μmol/g)
	Groups
	Control	APAP	KA-L	KA-H	NAC	Fer-1
Sample1	5.0079	1.09605	0.947006	2.31822	3.56561	2.54064
Sample2	3.73299	0.506752	1.56841	3.62752	4.81758	2.36866
Sample3	5.06752	1.52255	1.12357	4.41401	3.23083	2.39618
Sample4	4.5172	1.1144	1.55006	4.57452	3.59771	2.73554
Sample5	3.77427	2.00637	0.729172	3.36382	4.77401	2.56127
Fig2E. q-PCR
Gpx4
	Groups
	Control	APAP	KA-L	KA-H	NAC	Fer-1
Sample1	1.04356	0.455812	0.68137	1.12234	0.191645	0.730274
Sample2	0.980446	0.375402	0.779981	1.76726	0.148807	0.807486
Sample3	1.0618	0.569004	0.454235	1.55456	0.140293	0.856491
Sample4	1.09544	0.38999	0.601447	1.07662	0.251131	0.856491
Sample5	0.818759	0.395434	0.55153	1.9677	0.283518	0.93401
Acsl4
	Groups
	Control	APAP	KA-L	KA-H	NAC	Fer-1
Sample1	0.764633	1.94914	0.743724	0.995049	1.75666	0.472321
Sample2	1.03014	2.04605	0.872265	0.597843	0.672608	0.915631
Sample3	0.961154	1.88928	1.25079	0.649697	0.494088	1.68511
Sample4	1.08511	1.51345	1.07388	0.548225	1.13906	1.23357
Sample5	1.15897	1.9424	1.04815	0.701171	0.636326	1.19155
Ptgs2
	Groups
	Control	APAP	KA-L	KA-H	NAC	Fer-1
Sample1	1.29723	18.4485	3.82493	1.89926	1.09842	4.89204
Sample2	0.366132	11.3564	5.63898	2.71403	1.83456	4.50159
Sample3	0.512433	12.0874	10.7811	7.31286	1.43937	1.61377
Sample4	0.809686	10.7811	4.54864	5.7177	1.1215	3.53188
Sample5	2.01452	9.4836	8.0302	7.18723	1.60262	3.9053
Nrf2
	Groups
	Control	APAP	KA-L	KA-H	NAC	Fer-1
Sample1	1.08194	0.210022	0.226662	0.811472	1.58405	1.08569
Sample2	0.682364	0.501254	0.4114	0.875764	1.20048	1.40797
Sample3	0.746707	0.186031	0.24462	1.54608	1.12788	0.985286
Sample4	1.30913	0.345945	0.792023	1.12009	1.41776	0.951723
Sample5	1.17986	0.891072	0.417143	1.43755	1.36001	0.985286
Hmox1
	Groups
	Control	APAP	KA-L	KA-H	NAC	Fer-1
Sample1	1.46284	25.4356	16.898	9.63829	2.58252	6.53767
Sample2	1.02015	110.184	35.9714	18.4913	3.44326	8.07676
Sample3	0.456529	31.9729	16.6077	22.2199	3.56469	6.56037
Sample4	1.21738	41.4637	33.2153	23.4055	2.46874	8.24647
Sample5	0.843101	33.679	20.5887	18.4274	2.76787	8.47831
Sod2
	Groups
	Control	APAP	KA-L	KA-H	NAC	Fer-1
Sample1	0.732472	0.297476	0.523349	0.80154	1.03947	1.22761
Sample2	0.859069	0.512579	0.37784	0.807115	1.14143	0.946613
Sample3	1.50092	0.316625	0.586762	0.724896	0.933581	0.727413
Sample4	0.920728	0.669356	0.578683	0.966503	0.927132	0.986811
Sample5	0.986811	0.528819	0.273734	0.850184	0.953197	0.763577
Fig3A. CCK8
Cell vitality (%)
	Groups
	DMSO	APAP	APAP+KA
			KA-5μM	KA-10μM	KA-20μM
Sample1	100	65.9825	70.329	72.2608	79.9879
Sample2	100	61.7567	69.2424	76.9695	79.9879
Sample3	100	67.0691	69.8461	77.4525	78.9013
Fig3B. Intracellular GSH levels
GSH (μmol/gprot)
	Groups
	DMSO	APAP	APAP+KA
			KA-5μM	KA-10μM	KA-20μM
Sample1	113.061	74.7935	75.4971	76.9918	89.3284
Sample2	107.331	67.9129	66.8475	71.5873	81.7592
Sample3	110.22	70.5937	69.8474	74.2452	85.5125
Fig3E. q-PCR
GCLC
	Groups
	DMSO	APAP	APAP+KA
			KA-5μM	KA-10μM	KA-20μM
Sample1	1	0.553504	1.45397	1.33793	1.7818
Sample2	1	0.509328	1.50177	2.01857	2.08975
Sample3	1	0.517035	1.47087	1.59475	1.77154
SOD2
	Groups
	DMSO	APAP	APAP+KA
			KA-5μM	KA-10μM	KA-20μM
Sample1	1	0.33294	0.7457	1.1019	1.50525
Sample2	1	0.282567	0.926588	1.6358	1.46071
Sample3	1	0.272627	1.27162	1.59475	2.21146
NOX2
	Groups
	DMSO	APAP	APAP+KA
			KA-5μM	KA-10μM	KA-20μM
Sample1	1	1.16743	0.911722	0.773782	0.806642
Sample2	1	1.28937	1.00928	0.764895	0.597358
Sample3	1	1.26429	0.986233	0.725309	0.746562
PTGS2
	Groups
	DMSO	APAP	APAP+KA
			KA-5μM	KA-10μM	KA-20μM
Sample1	1.09351	4.88704	1.93718	1.97789	1.91051
Sample2	1.10877	3.83429	2.2485	2.66468	1.62333
Sample3	0.797724	4.08111	2.23297	2.46906	1.54645
FigS1A. Survival rate
Hours elapsed (h)	Groups
	APAP	APAP+KA
4	1
8	1
10	1
20	1
26	1
30	1
36	1
40	1
72	0
72	0
72	0
6		1
24		1
37		1
72		0
72		0
72		0
72		0
72		0
72		0
72		0
72		0
FigS2. Liver GSH levels
Hepatic GSH (μmol/gprot)
Time（h）	APAP
0	348.741	449.827	475.473		237.672
1.5	40.6584	48.407	46.1142	37.2057	42.8739	44.2364
3	116.324	103.372	91.2504	111.684
24	212.089	309.947	159.744	145.189
Time（h）	APAP + KA
0	348.741	449.827	475.473	228.568
1.5	46.5525	43.7054	38.2799	62.6835	49.8421	52.72
3	152.708	138.393	130.689	178.987
24	274.631	393.885	405.39	437.52
FigS3. CCK8
Cell vitality (%)
KA (μM)	0	1	2.5	5	10	20	40
Sample 1	100	86.7738	88.2571	83.6836	83.1891	81.0878	82.9419
Sample 2	100	85.5377	87.1446	85.4141	84.3016	86.7738	84.178
Sample 3	100	87.1446	84.9197	85.5377	80.3461	83.6836	82.6947
FigS4. q-PCR
Sult1a1
	Groups
	Control	APAP	APAP + KA
Sample1	1.08674	2.62079	2.65737
Sample2	0.946058	2.36198	2.75108
Sample3	1.15669	2.36198	3.29436
Sample4	0.840896	2.26577	2.60268
Sample5	1	2.25012	3.31728
GSTa
	Groups
	Control	APAP	APAP + KA
Sample1	0.888843	0.895025	3.11666
Sample2	0.752623	1.12506	2.05623
Sample3	1.06437	1.23114	1.64718
Sample4	1.40444	0.773782	1.89211
Sample5		1.59107	2.94854
Sample6		1.97246
Sample7		1.82766
Ugt1a1
	Groups
	Control	APAP	APAP + KA
Sample1	1.19127	0.825019	2.19238
Sample2	0.759173	1.19127	1.84357
Sample3	1.11149	0.860055	1.14274
Sample4	0.994815	1.09619	1.61608
Sample5	1	1.13485	1.0299
Sample6			1.56103
Ugt1a9
	Groups
	Control	APAP	APAP + KA
Sample1	0.972655	0.986233	1.85318
Sample2	1.00696	1.04247	1.8025
Sample3	0.933033	1.13288	1.55833
Sample4	1.18099	1.56917	2.11404
Sample5	0.926588	1.70527	2.17347
Sample6		0.913831
Sample7		1.65864
Mrp2
	Groups
	Control	APAP	APAP + KA
Sample1	1.50351	0.741405	4.05106
Sample2	0.938438	2.21606	2.7862
Sample3	0.731198	1.77563	2.21653
Sample4	1.09303	2.05385	2.02553
Sample5	1.49312	0.971532	5.38259
Sample6	0.593917	0.794618
Mrp3
	Groups
	Control	APAP	APAP + KA
Sample1	1.37554	3.55537	6.82108
Sample2	0.858565	4.05584	6.10504
Sample3	0.895025	4.75683	6.02099
Sample4	1.38511	2.53151	6.19026
Sample5	0.68302	5.27803
Mrp5
	Groups
	Control	APAP	APAP + KA
Sample1	0.80107	1.22264	2.82843
Sample2	0.972655	1.24833	2
Sample3	1.28343	1.55833	2.15846
Sample4	1	1.72907	3.97237
