# Supplementary material for: Kaempferol prevents acetaminophen-induced liver injury by suppressing hepatocyte ferroptosis via Nrf2 pathway activation
Source: Royal Society of Chemistry journal article supplement (doi:10.1039/d2fo02716j), 2023-01-01
Supplement: d2fo02716j4.pdf [file d2fo02716j4.pdf]

## SUPPORTING INFORMATION

### **Kaempferol Prevents Acetaminophen-induced Liver Injury by Suppressing Hepatocyte Ferroptosis via Nrf2 Pathway Activation**

Huiyi Li <sup>a, b, c, d, ¶</sup>, Qiqing Weng <sup>a, b, c, d, ¶</sup>, Shuai Gong <sup>a, b, c, d</sup>, Weixian Zhang <sup>a, b, c, d</sup>, Jiaqi Wang <sup>a, b, c, d</sup>, Yuqiao Huang <sup>a, b, c, d</sup>, Yuanjun Li <sup>a, b, c, d</sup>, Jiao Guo <sup>a, b, c, d</sup>, Tian Lan <sup>a, b, c, d, \*</sup>

<sup>a</sup>Institute of Chinese Medicine, Guangdong Pharmaceutical University; Guangzhou 510006, China

<sup>b</sup>Guangdong Metabolic Diseases Research Center of Integrated Chinese and Western Medicine; Guangzhou 510006, China.

<sup>c</sup>Key Laboratory of Glucolipid Metabolic Disorder, Ministry of Education of China; Guangzhou 510006, China.

<sup>d</sup>Guangdong TCM Key Laboratory for Metabolic Diseases; Guangzhou 510006, China.

¶These authors contributed equally to this work.

\*Corresponding Authors:

Tian Lan, Professor, 280 Wai Huan Dong Road, Guangdong Pharmaceutical University, Guangzhou Higher Education Mega Center, Guangzhou 510006, China. E-mail:

[lantian012345@163.com](mailto:lantian012345@163.com)

# 1. Materials and methods

## 1.1 Chemicals and reagents

The primary antibody specific against CD68 was purchased from Boster (Wuhan, China). The primary antibody specific against Keap1 was purchased from Affinity (Jiangsu, China).

## 1.2 Experimental design

Balb/c male mice, fasted for 22 hours, were injected with APAP (250 mg/kg) intraperitoneally (i.p.) and intragastrically administrated with KA (80 mg/kg, dissolved in 0.5% CMC-Na) or 0.5% CMC-Na 2 hours before APAP injection. The mice were anesthetized and sacrificed at 0, 1.5, 3 or 24 h after APAP treatment and the livers were immediately collected, frozen in liquid nitrogen and then stored at  $-80^{\circ}\text{C}$  until analysis.

## 1.3 Survival study

The survival study was performed as described previously<sup>1</sup>. Balb/c male mice were randomly divided into the APAP group and the KA treatment group. Mice were fasted for 22 hours, and intraperitoneally (i.p.) injected with APAP (300 mg/kg). The KA treatment group was intragastrically administrated with KA (80 mg/kg, dissolved in 0.5% CMC-Na) 2 hours before APAP injection, and the APAP group was intragastrically administrated with the same volume of 0.5% CMC-Na. The survival of the mice was observed and recorded over a 72-hour period.

## 1.4 Immunohistochemistry staining

Immunohistochemistry staining was performed as described previously<sup>2</sup>. Briefly, liver specimens fixed in 10% neutral buffered were embedded in paraffin blocks. For immunohistochemical analyses, liver sections (4  $\mu\text{m}$  thick) were separated, rehydrated, and sequentially incubated with primary antibodies and secondary antibodies.

### *1.5 Measurement of hepatic GSH levels*

For hepatic biochemical parameters determination, liver tissue was homogenized in nine-fold (g/mL) of ice-cold PBS, and then centrifuged at  $600 \times g$  for 10 min at  $4^{\circ}\text{C}$  to obtain the supernatants<sup>3</sup>. Hepatic GSH levels were measured using reagent kits (Nanjing Jiancheng Bioengineering Institute, Nanjing, China) by standard enzymatic procedures.

### *1.6 CCK8 assay*

The L02 cells viability was measured by cell CCK8 colorimetric assay, according to the manufacturer's instructions (BioSharp, China). The CCK8 assay was performed as described previously<sup>4</sup>. L02 cells were subcultured in 96-well plates with complete medium and treated with different concentrations of KA for 24 h. After treatments, CCK8 reagent was added into each well, followed by incubating for another 1.5 h in a  $37^{\circ}\text{C}$  incubator with 5%  $\text{CO}_2$ . Then, the absorbance was measured by a microplate reader at 450 nm (Bio-Rad, Hercules, CA, USA), and cell viability was expressed as percentage values, as compared with the control group.

### *1.7 Quantitative real-time PCR (q-PCR)*

Mouse liver RNA was extracted by TransZol Up Reagent, according to the manufacturer's instructions (TransGen, Beijing, China). Total RNA concentration was quantified by the NanoDrop ND-1000 spectrophotometer (Thermo Scientific, MA, USA). RNA was reverse transcribed using a PrimeScript<sup>TM</sup> RT reagent Kit with gDNA Eraser (Takara, Tokyo, Japan) according to the manufacturer's instruction. cDNA was synthesized with the SYBR Green Supermix (Bio-Rad, Hercules, USA) and detected by LightCycler 480II (Roche, Indiana, USA). The sample was performed for 5 min at  $95^{\circ}\text{C}$ , 45 cycles of 10 s at  $95^{\circ}\text{C}$  and 15 s at  $60^{\circ}\text{C}$  and 20 s at  $72^{\circ}\text{C}$ . The  $2^{-\Delta\Delta\text{Ct}}$  method was used to calculate the fold change difference between experimental and calibration

samples<sup>5</sup>. *Gapdh* was used as an internal control. The primer sequences were summarized in Table S1.

### *1.8 Western blotting*

Liver tissue and the L02 cells were lysed with RIPA buffer<sup>6</sup>. Proteins were subjected to SDS-PAGE electrophoresis and transferred to a PVDF membrane. After incubation in blocking buffer (5% nonfat milk in Tris-buffered saline Tween), membranes were incubated with specific antibodies for immunoblot analyses. Bands were visualized by the enhanced chemiluminescence (ECL) system (Clinx, Shanghai, China).

### *1.9 Statistical analysis*

All data were statistically analyzed by using GraphPad Prism (version 6.0 for Windows), and values were expressed as the mean  $\pm$  standard deviation (SD). Differences between the means of the two groups were analyzed by a two-tailed unpaired Student's t-test and were considered statistically significant when  $P < 0.05$ , while for comparisons between more than two groups a one-way ANOVA was performed.

## 2. Supplementary data

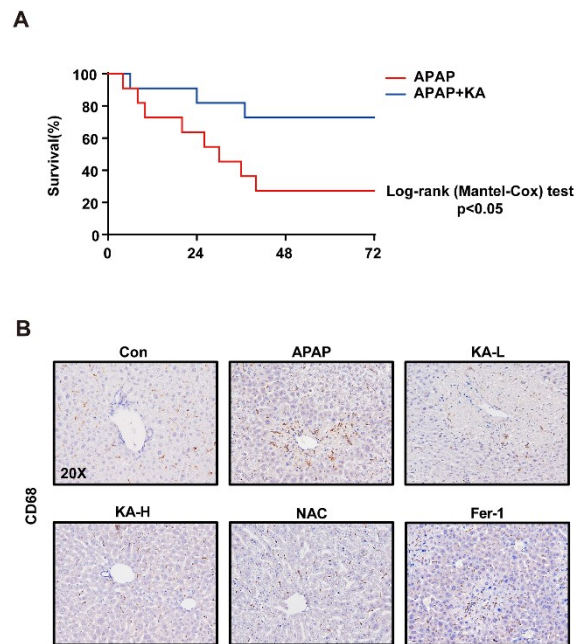

**Figure S1. KA attenuates APAP-induced liver injury and inflammation.**

(A) Balb/c male mice were fasted for 22 hours, and intraperitoneally (i.p.) injected with APAP (300 mg/kg). The KA treatment group was intragastrically administered with KA (80 mg/kg, dissolved in 0.5% CMC-Na) 2 hours before APAP injection. The survival of the mice in the two groups was observed and recorded (n=10-11 per group). (B) Representative images of immunohistochemistry staining of hepatic CD68 in mice.

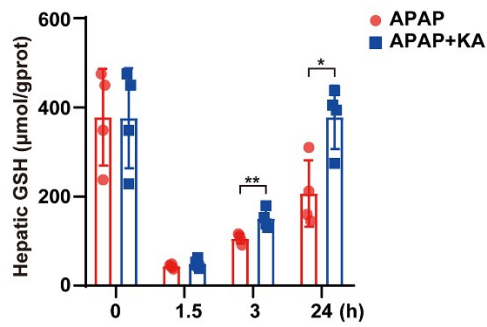

**Figure S2. KA significantly reverses the decreased GSH levels induced by overdose APAP.**

Balb/c male mice, fasted for 22 hours, were injected with APAP (250 mg/kg) intraperitoneally and treated with KA (80 mg/kg) or CMC-Na 2 hours before APAP injection. The mice were humanely sacrificed at 0, 1.5, 3 or 24 h after APAP treatment and the livers were collected. GSH levels of livers at different time after APAP injection were measured (n = 4 per group). The data are presented as the mean  $\pm$  SD. \*indicates a significant difference compared to the corresponding APAP group ;

\* $P < 0.05$ , \*\* $P < 0.01$ .

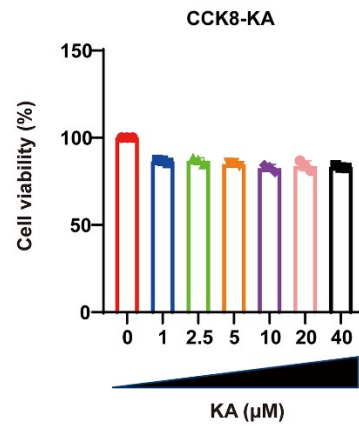

**Figure S3. KA has no inhibitory effect on L02 cell activity.**

Cell viabilities of L02 cells were examined by CCK8 assays after the treatment of different concentrations of KA (n = 3 per group).

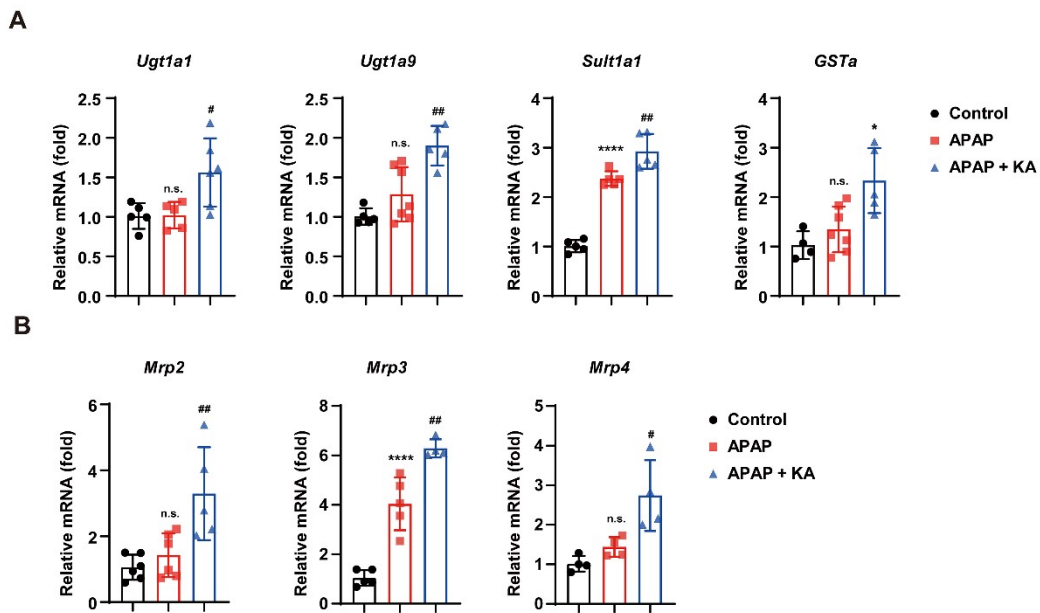

**Figure S4. KA promotes the metabolism of APAP through two-phase metabolic pathways.**

Balb/c male mice, fasted for 22 hours, were injected with APAP (250 mg/kg) intraperitoneally and treated with KA (80 mg/kg) and CMC-Na 2 hours before APAP injection. The mice were humanely sacrificed 24 h after APAP treatment. (A) qPCR analysis of the transcript levels of genes related to two-phase metabolism and detoxification of APAP (*Ugt1a1*, *Ugt1a9*, *Sult1a1* and *Gsta*). Gene expression was normalized to *Gapdh* mRNA levels (n=4-6 per group). (B) qPCR analysis of the transcript levels of genes related to multidrug resistance-associated proteins (*Mrp2*, *Mrp3* and *Mrp4*). Gene expression was normalized to *Gapdh* mRNA levels (n=4-6 per group). The data are presented as the mean  $\pm$  SD. \* indicates a significant difference compared to the control group; \*\*\*\* $P$  < 0.0001. # indicates a significant difference compared to the APAP group; # $P$  < 0.05, ## $P$  < 0.01.



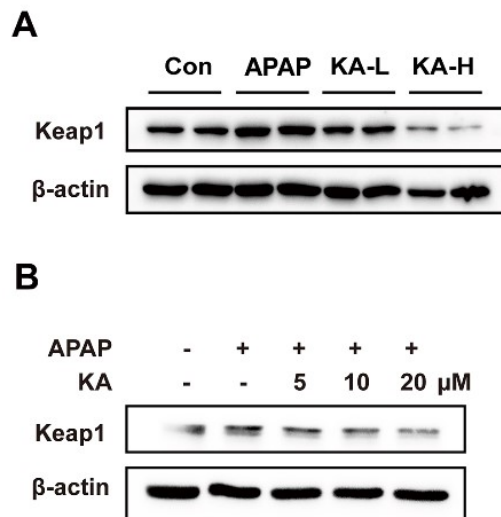

**Figure S5. KA reduces Keap1 protein levels increased by APAP *in vivo* and *in vitro*.**

(A) The Keap1 expression in mouse liver was detected by immunoblotting using a specific antibody, and  $\beta$ -actin was used as a loading control. (B) L02 cells were treated with KA (0  $\mu$ M, 5  $\mu$ M, 10  $\mu$ M or 20  $\mu$ M) in response to APAP (5 mM) for 24 h. The protein expression of Keap1 was detected by immunoblotting, and  $\beta$ -actin was used as a loading control.

**Table S1. Primer sequences for real-time PCR**

| <b>Primer name</b> | <b>Forward primer sequence</b> | <b>Reverse primer sequence</b> |
|--------------------|--------------------------------|--------------------------------|
| <b>Human</b>       |                                |                                |
| <i>GAPDH</i>       | GGAGCGAGATCCCTCCAAAAT          | GGCTGTTGTCATACTTCTCATGG        |
| <i>PTGS2</i>       | CGGTGAAACTCTGGCTAGACAG         | GCAAACCGTAGATGCTCAGGGA         |
| <i>NRF2</i>        | TCCAGTCAGAAACCAGTGGAT          | GAATGTCTGCGCCAAAAGCTG          |
| <i>GCLC</i>        | GCAAGGCCCGAGAACAGCACG          | TCCCTCATCCATCTGGCAACTGT        |
| <i>SOD2</i>        | CCCGACCTGCCCTACGACTAC          | AACGCCTCCTGGTACTTCTCCTC        |
| <i>NOX2</i>        | AAGATGCGTGGAACCTACCTAA         | TTTTTGAGCTTCAGATTGGTGG         |
| <b>Mice</b>        |                                |                                |
| <i>Gapdh</i>       | AGGAGTAAGAAACCCTGGAC           | CTGGGATGGAATTGTGAG             |
| <i>Ptgs2</i>       | ATCCAAACCAGCAGACTCATA          | CTTGAGTTTGAAGTGGTAACCG         |
| <i>Gpx4</i>        | GCCAAAGTCCTAGGAAACGC           | CCGGGTTGAAAGGTTTCAGGA          |
| <i>Nrf2</i>        | GAGACGGCCATGACTGAT             | GTGAGGGGATCGATGAGTAA           |
| <i>Tnfa</i>        | TAGGCCATTGTGTATGCAGC           | ACTCCAACCCAGGTCCTTC            |
| <i>Il1b</i>        | TCAGGACAGATGCAGATGCT           | CTGGAAAACCTTCCTGCTGT           |
| <i>Il6</i>         | TAGGCCATTGTGTATGCAGC           | ACATGTTTCAGCTTTGTGGACC         |
| <i>Ccl2</i>        | TTAAAAACCTGGATCGGAACCAA        | GCATTAGCTTCAGATTTTCGGGT        |
| <i>Ccl5</i>        | GTATTTCTACACCAGCAGCAAG         | TCTTGAACCCACTTCTTCTCTG         |
| <i>Acsl4</i>       | CTCACCATTATATTGCTGCCTGT        | TCTCTTTGCCATAGCGTTTTTCT        |
| <i>Sod2</i>        | TCCCAGACCTGCCTTACGACTAT        | GGTGGCGTTGAGATTGTTCA           |
| <i>Ugt1a1</i>      | GCTTCTTCCGTACCTTCTGTTG         | GCTGCTGAATAACTCCAAGCAT         |
| <i>Ugt1a9</i>      | TGTGTGGATTAATTGTCGCCA          | CAAAGATCACTGATGGGAGCG          |
| <i>Sult1a1</i>     | TGATCTATCAGGGTGGCAAGC          | CAGAGTTTCAAGACCTGGGGG          |
| <i>Gsta</i>        | AAGCCCGTGCTTCACTACTTC          | GGGCACTTGGTCAAACATCAAA         |
| <i>Mrp2</i>        | GTGTGGATTCCCTTGGGCTTT          | CACAACGAACACCTGCTTGG           |
| <i>Mrp3</i>        | ACTTCTCCGAAACTACGCACC          | GCTGGCTCATTGTCTGTCAGGT         |
| <i>Mrp4</i>        | CATCGCGGTAACCGTCCTC            | CCGCAGTTTTACTCCGCAG            |

## References

1. K. Yamaura, N. Nakayama, M. Shimada and K. Ueno, Protective effects of natsumikan (*Citrus natsudaikai*) extract on acetaminophen-induced lethal hepatotoxicity in mice, *Pharmacognosy Res*, 2012, **4**, 234-236.
2. Y. Wang, L. Tian, Y. Wang, T. Zhao, A. Khan, Y. Wang, J. Cao and G. Cheng, Protective effect of Que Zui tea hot-water and aqueous ethanol extract against acetaminophen-induced liver injury in mice via inhibition of oxidative stress, inflammation, and apoptosis, *Food Funct*, 2021, **12**, 2468-2480.
3. Y. Li, J. Xu, D. Li, H. Ma, Y. Mu, X. Huang and L. Li, Guavinoside B from *Psidium guajava* alleviates acetaminophen-induced liver injury via regulating the Nrf2 and JNK signaling pathways, *Food Funct*, 2020, **11**, 8297-8308.
4. X. Zhao, C. Wang, S. Dai, Y. Liu, F. Zhang, C. Peng and Y. Li, Quercetin Protects Ethanol-Induced Hepatocyte Pyroptosis via Scavenging Mitochondrial ROS and Promoting PGC-1 $\alpha$ -Regulated Mitochondrial Homeostasis in L02 Cells, *Oxid Med Cell Longev*, 2022, **2022**, 4591134.
5. T. D. Schmittgen and K. J. Livak, Analyzing real-time PCR data by the comparative C(T) method, *Nat Protoc*, 2008, **3**, 1101-1108.
6. T. Y. Li, Y. Sun, Y. Liang, Q. Liu, Y. Shi, C. S. Zhang, C. Zhang, L. Song, P. Zhang, X. Zhang, X. Li, T. Chen, H. Y. Huang, X. He, Y. Wang, Y. Q. Wu, S. Chen, M. Jiang, C. Chen, C. Xie, J. Y. Yang, Y. Lin, S. Zhao, Z. Ye, S. Y. Lin, D. T. Chiu and S. C. Lin, ULK1/2 Constitute a Bifurcate Node Controlling Glucose Metabolic Fluxes in Addition to Autophagy, *Mol Cell*, 2016, **62**, 359-370.
