# Supplementary figures and images for: Kaempferol prevents acetaminophen-induced liver injury by suppressing hepatocyte ferroptosis via Nrf2 pathway activation
Source: Royal Society of Chemistry journal article supplement (doi:10.1039/d2fo02716j), 2023-01-01

## Electrophoretic gels and blots

### 1. Figure 2C

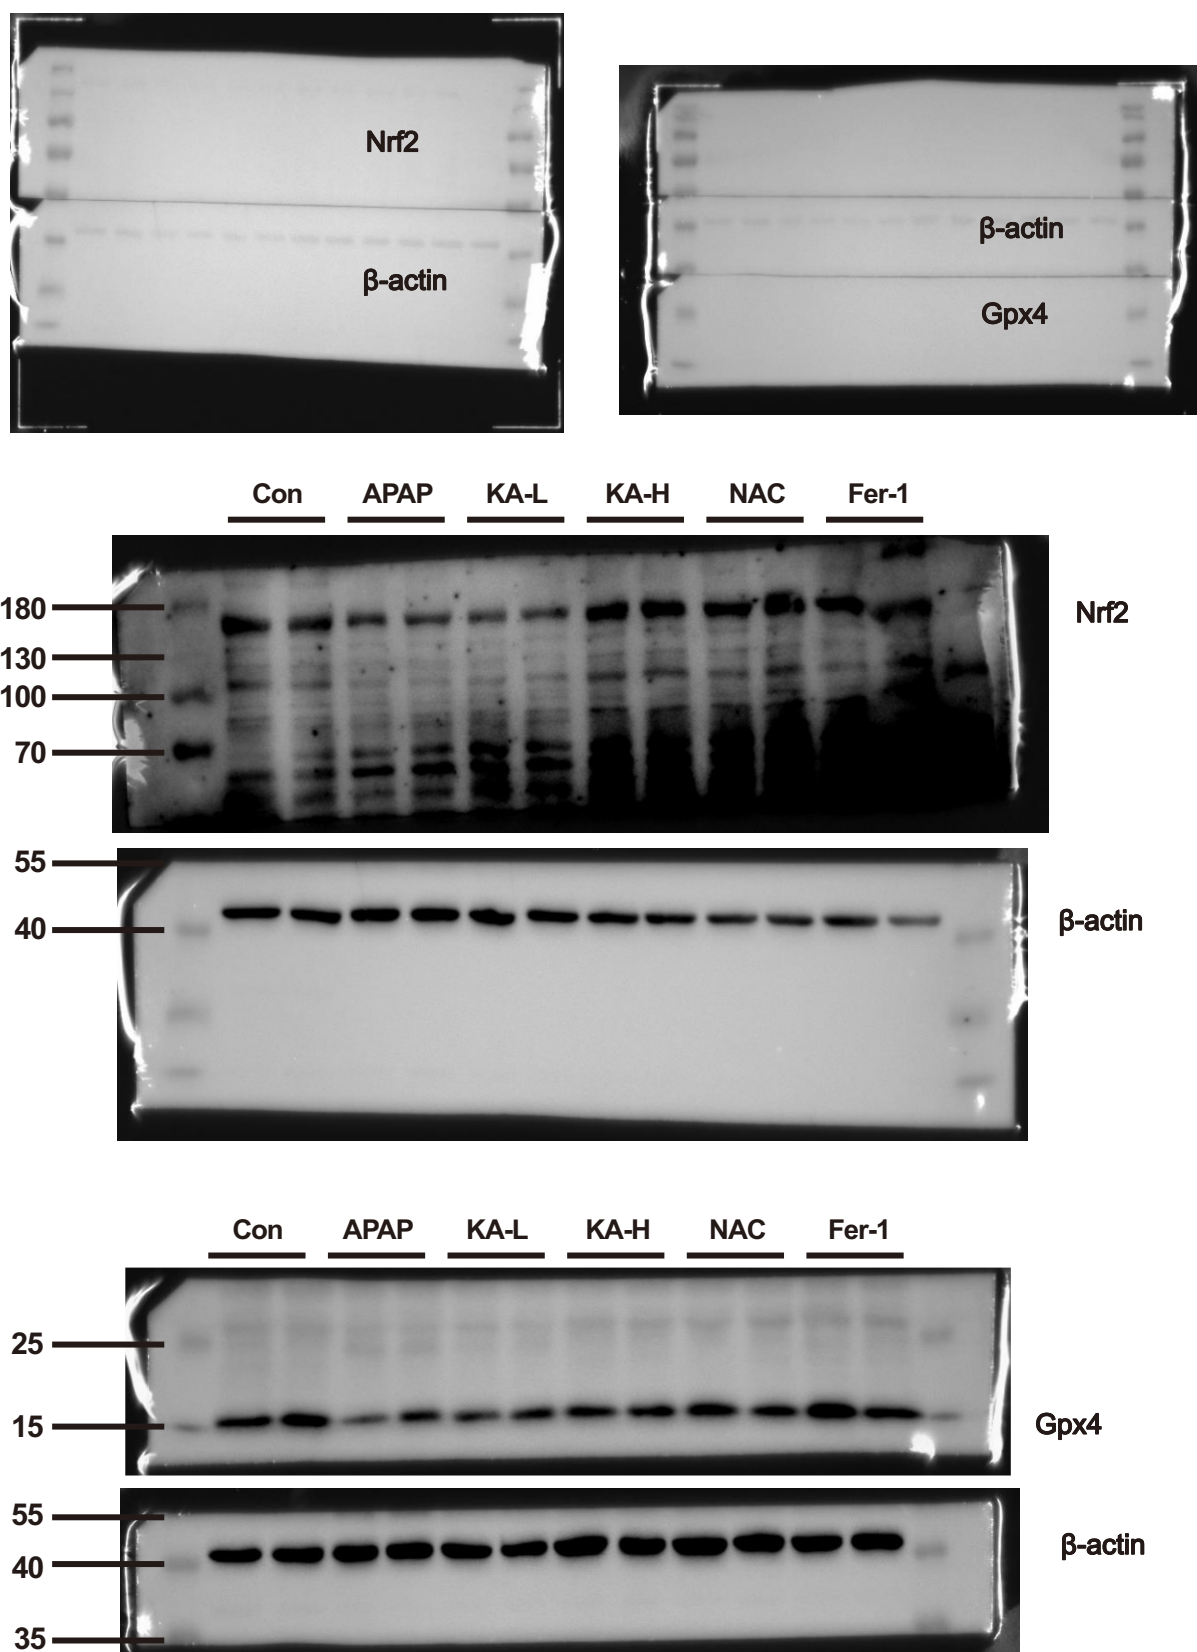

2. Figure 3C

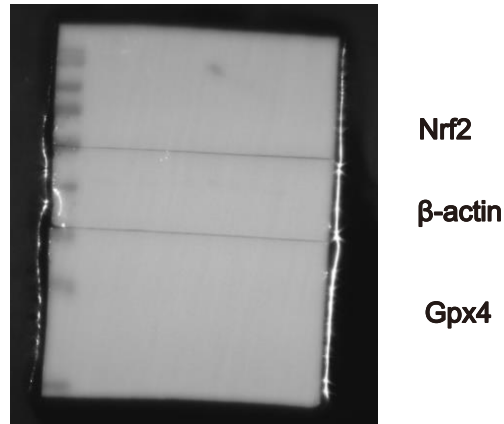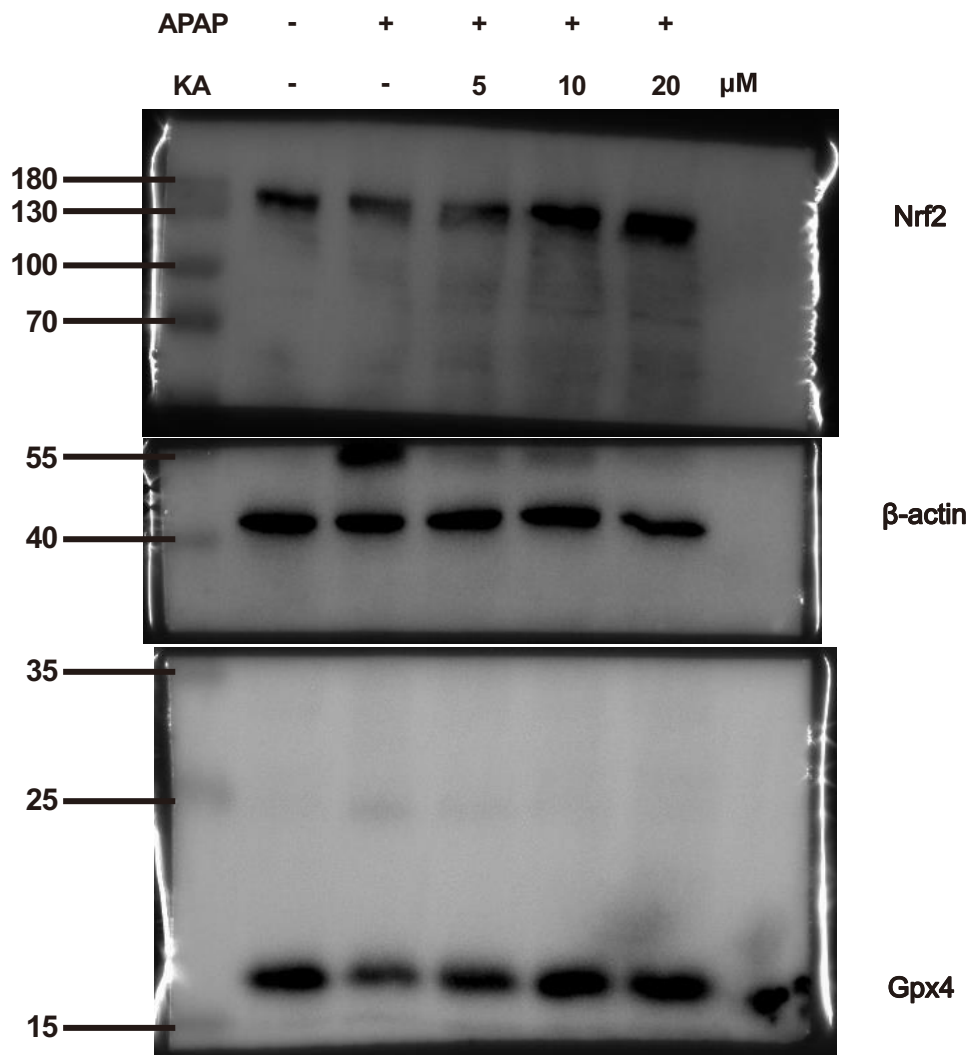

3. Figure S5A

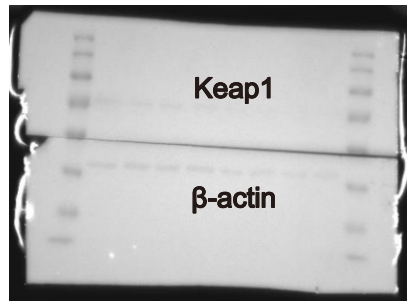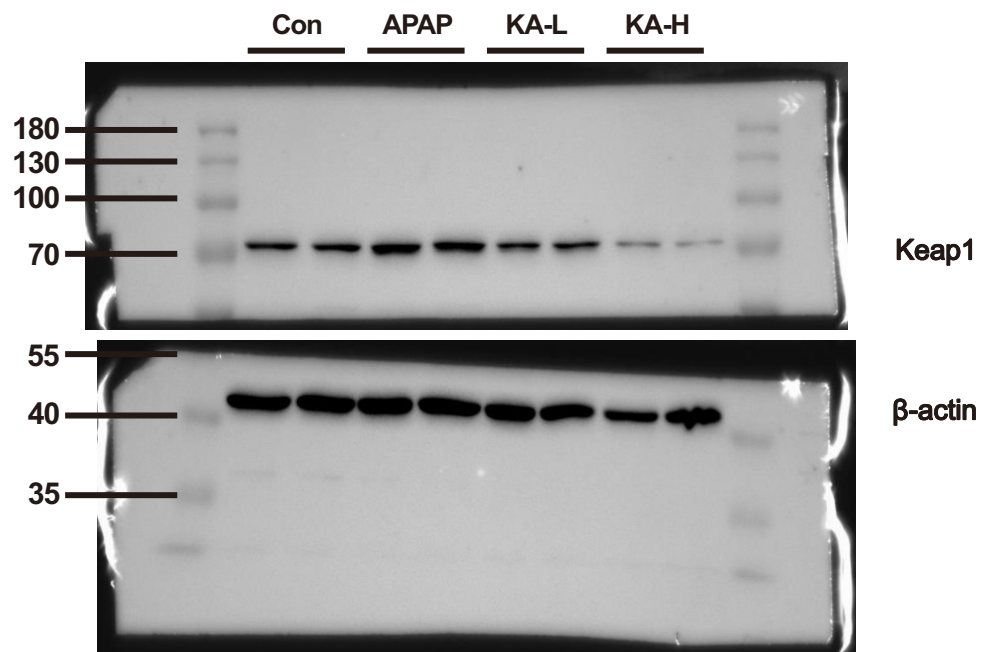

4. Figure S5B

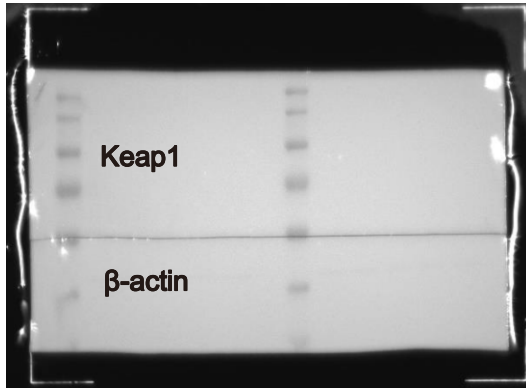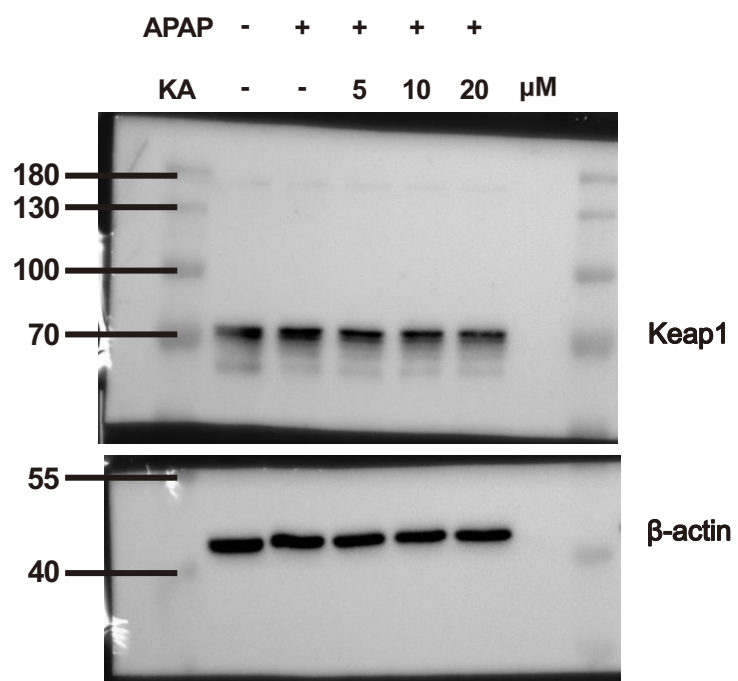

Supplement: d2fo02716j1.pdf [file d2fo02716j1.pdf]
